# Supplementary material for: Leukemia Inhibitory Factor-Receptor is Dispensable for Prenatal Testis Development but is Required in Sertoli cells for Normal Spermatogenesis in Mice
Source: PubMed Central journal article supplement (PMC6070476; doi:10.1038/s41598-018-30011-w), 2018-08-01

# Leukemia Inhibitory Factor-Receptor is Dispensable for Prenatal Testis Development but is Required in Sertoli cells for Normal Spermatogenesis in Mice.

Michael Curley<sup>1</sup>, Laura Milne<sup>1</sup>, Sarah Smith<sup>1</sup>, Nina Atanassova<sup>2</sup>, Diane Rebourcet<sup>1</sup>, Annalucia Darbey<sup>1</sup>, Patrick W.F. Hadoke<sup>3</sup>, Sara Wells<sup>4</sup> and Lee B. Smith<sup>1,5\*</sup>

<sup>1</sup> MRC Centre for Reproductive Health, University of Edinburgh, The Queen's Medical Research Institute, 47 Little France Crescent, Edinburgh, EH16 4TJ, United Kingdom.

<sup>2</sup> Institute of Experimental Morphology, Pathology and Anthropology with Museum, Bulgarian Academy of Sciences, 1113, Sofia, Bulgaria

<sup>3</sup> The British Heart Foundation Centre for Cardiovascular Science, University of Edinburgh, The Queen's Medical Research Institute, Edinburgh, EH16 4TJ, United Kingdom.

<sup>4</sup> Mary Lyons Centre, MRC Harwell, Harwell Campus, Oxfordshire, OX11 ORD, United Kingdom.

<sup>5</sup> School of Environmental and Life Sciences, University of Newcastle, Callaghan, NSW 2308, Australia.

\* Correspondence and requests for materials: Professor Lee Smith, MRC Centre for Reproductive Health, University of Edinburgh, The Queen's Medical Research Institute, 47 Little France Crescent, Edinburgh, EH16 4TJ, United Kingdom.

e-mail: [lee.smith@ed.ac.uk](mailto:lee.smith@ed.ac.uk)

## Supplementary Information

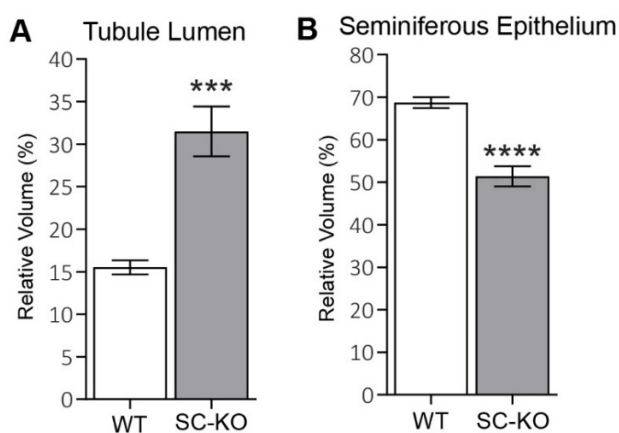

**Supplemental Figure 1. Altered seminiferous tubule lumen and seminiferous epithelium in SC-KO testes.** A two-fold increase in percentage volume of the tubule lumen (A) and a 25% reduction in the seminiferous epithelium (B) was observed when *Lifr* is disrupted in Sertoli cells (Unpaired *t*-tests; \*\*\*  $p = 0.0002$  and \*\*\*\*  $p = <0.0001$  respectively,  $n = 7$ ).

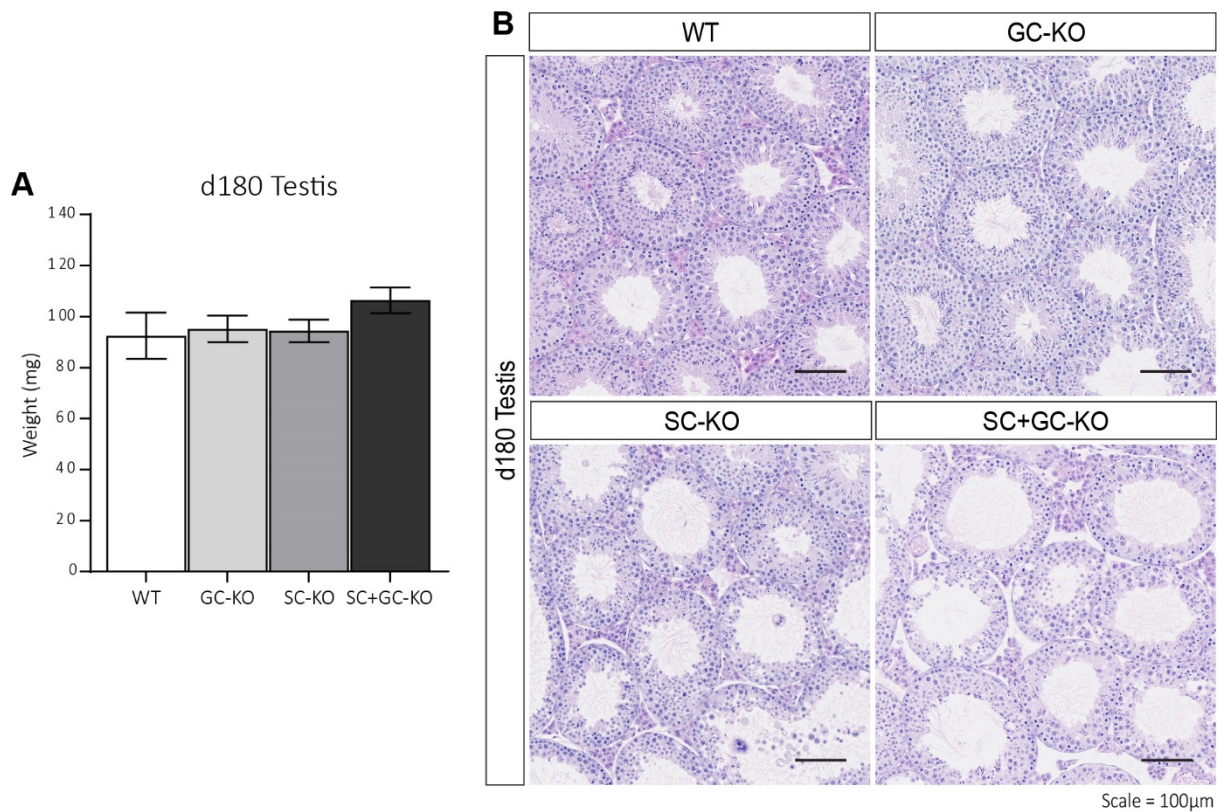

**Supplemental Figure 2. No additional effect is observed when *Lifr* is disrupted in both germ cells and Sertoli cells.** (A) No significant difference in testis weight at d180 was observed when *Lifr* is disrupted in both germ cells and Sertoli cells (GC+SC-KO; 1-way AVOVA, n = 6-13). (B) Representative H&E staining of WT, GC-KO, SC-KO and GC+SC-KO testes at d180. Testicular phenotype was similar in both SC-KO and GC+SC-KO confirming that *Lifr* is dispensable in germ cells but not Sertoli cells for normal spermatogenic function. Scale = 100µm.

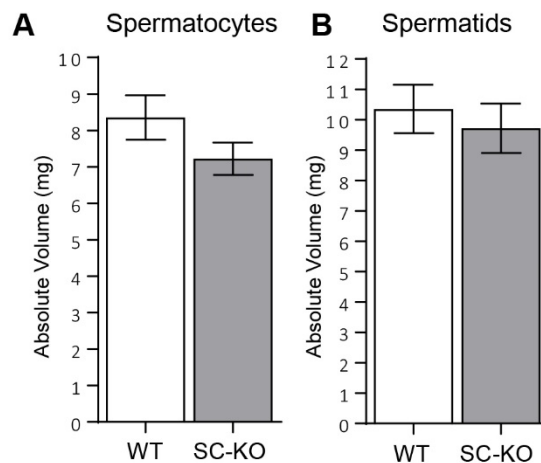

**Supplemental Figure 3. Spermatocyte and spermatid volume is unaltered in SC-KO testes.** No difference in (A) spermatocyte or (B) spermatid volume per testis was observed between WT and SC-KO mice (unpaired *t*-test; n = 7).

Full images of blots from figures 1C and 3F and G.

Western Blot from Fig. 1

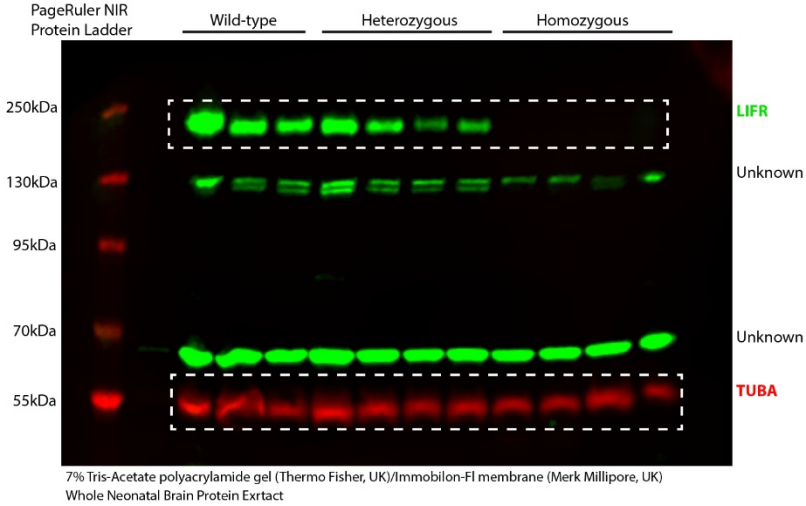

Western Blots from Fig. 3

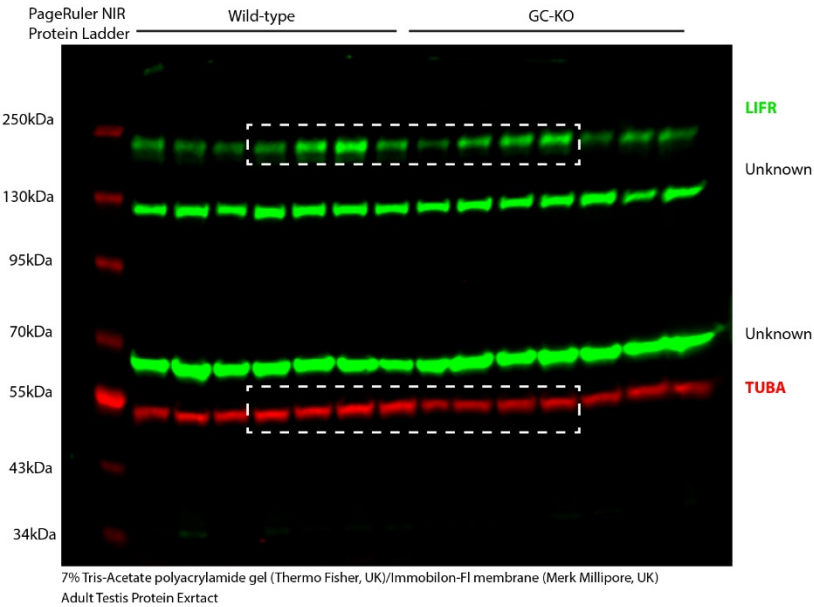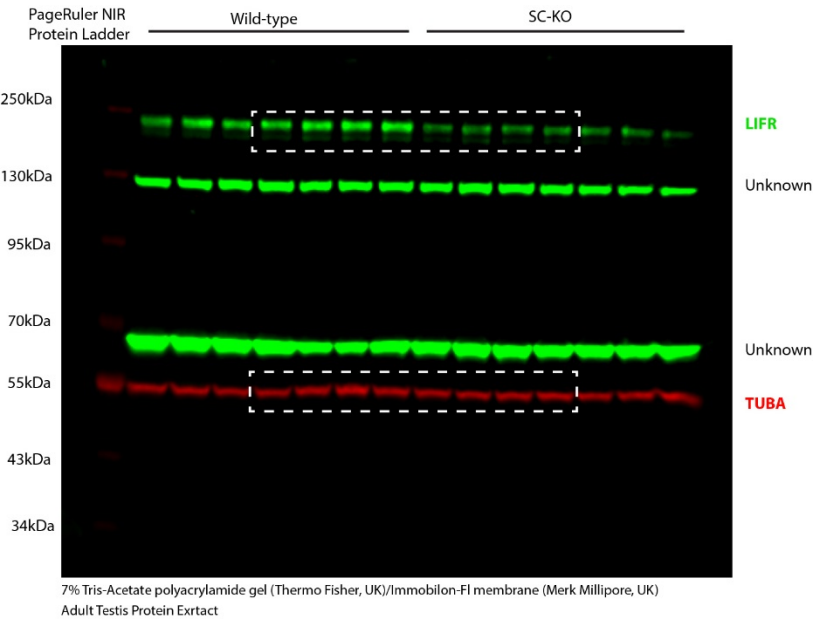

Supplement: 41598_2018_30011_MOESM1_ESM.pdf [file 41598_2018_30011_MOESM1_ESM.pdf]
